# Supplementary material for: Hectogram-scale green synthesis of hierarchical 4A zeolite@CuOx(OH)(2−2x) (0 ≤ x < 1) nanosheet assemblies core–shell nanoarchitectures with Superb Congo red adsorption performance
Source: Royal Society of Chemistry journal article supplement (doi:10.1039/c9ra09899b), 2020-01-01
Supplement: c9ra09899b2.pdf [file c9ra09899b2.pdf]

## Hectogram-scale Green Synthesis of Hierarchical 4A Zeolite @

## $\text{CuO}_x(\text{OH})_{(2-2x)}(0 \leq x < 1)$ Nanosheet Assemblies Core-Shell

## Nanoarchitectures with Superb Congo Red Adsorption Performance

*Leitao Zhang<sup>a,b,§</sup>, Lilan Huang<sup>a,§</sup>, Lei Zhang<sup>a</sup>, Binzhong Lu<sup>b</sup>, Junbo Li<sup>b</sup>, Yingfang Xie<sup>a</sup>, Qiang Ma<sup>a</sup>, Qingping Xin<sup>a</sup>, Hui Ye<sup>a</sup>, Lizhi Zhao<sup>a</sup>, Yuzhong Zhang<sup>a,□</sup>, Hong Li<sup>a</sup>.*

§ These authors contributed equally to this work and were the co-first authors;

□ Corresponding author: Yuzhong Zhang

Corresponding E-mail: [Zhangyz2004cn@163.com](mailto:Zhangyz2004cn@163.com)

*a* State Key Laboratory of Separation Membranes and Membrane Processes, School of Materials Science and Engineering, Tianjin Polytechnic University, Tianjin 300387, PR China

*b* School of Chemical Engineering and Pharmaceutics, Henan University of Science and Technology, Luoyang 47100, Henan, P. R. China.

## S1 Characterizations of as-obtained adsorbents

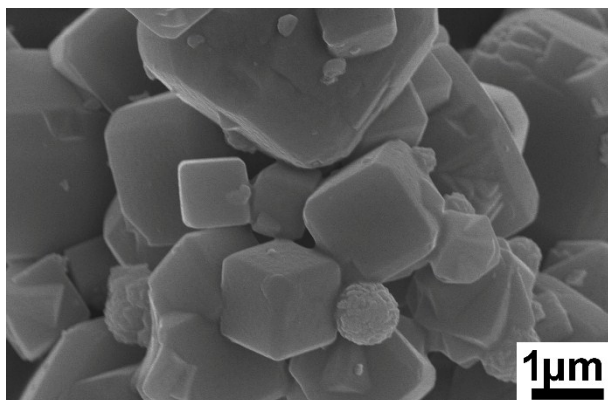

**Figure S1.** The SEM image of 4A zeolite.

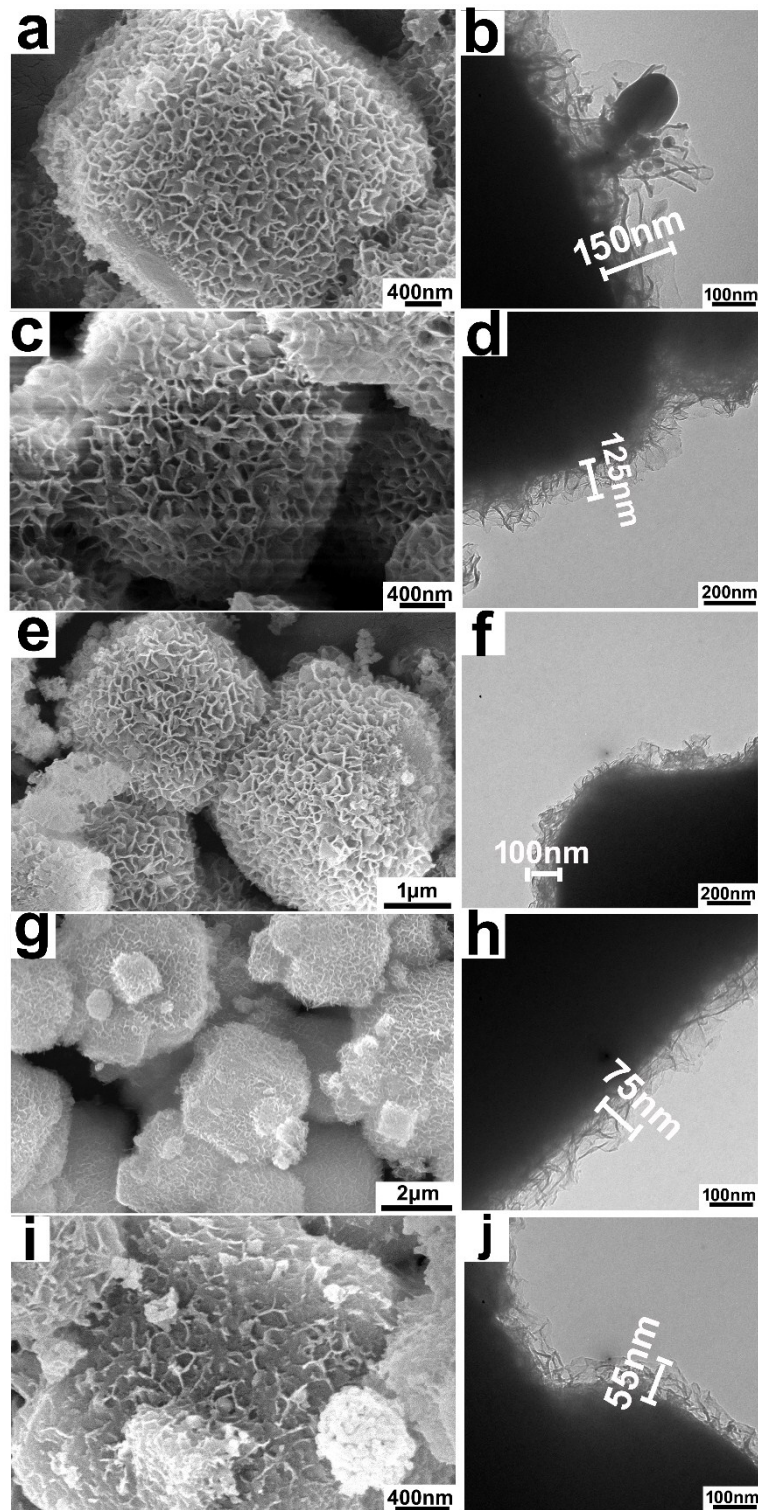

**Figure S2.** The effect of temperature treatment on the thickness of  $\text{CuO}_x\text{Cu}(\text{OH})_{(2-2x)}$  ( $0 \leq x < 1$ ) nanosheet assemblies on the surface of 4A zeolite. **SEM images:** a) 4A-Cu (-55°C); c) 4A-Cu-200 (200°C); e) 4A-Cu-300 (300°C); g) 4A-Cu-400 (400°C); i) 4A-Cu-500 (500°C). **TEM images:** b) 4A-Cu (-55°C); d) 4A-Cu-200 (200°C); f) 4A-Cu-300 (300°C); h) 4A-Cu-400 (400°C); j) 4A-Cu-500 (500°C).

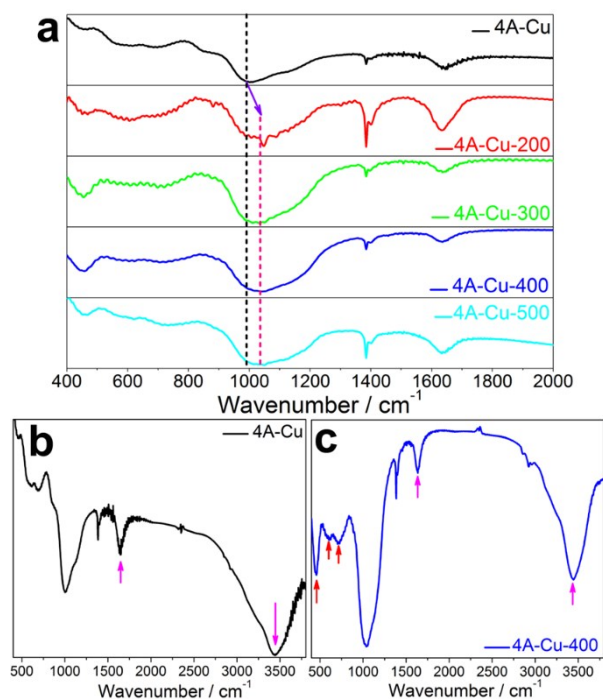

**Figure S3.** The FTIR of core-shell 3D assemblies. a) The FTIR fingerprint of 4A-Cu, 4A-Cu-200, 4A-Cu-300, 4A-Cu-400 and 4A-Cu-500. The FTIR spectra range from 400cm-1 to 4000cm-1 of (b) 4A-Cu and (c) 4A-Cu-400.

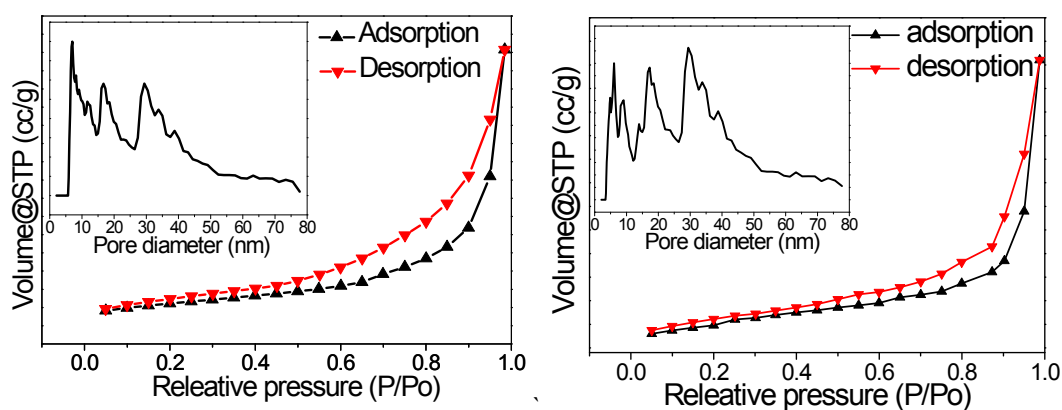

**Figure S4.** N<sub>2</sub> adsorption / desorption isotherms and pore size distribution (inset) of left) 4A-Cu and right) 4A-Cu-300.

**Table S1.** The physical properties of 4A zeolite, 4A-Cu and 4A-Cu-T samples.

| Sample                                                              | 4A-Cu  | 4A-Cu-200 | 4A-Cu-300 | 4A-Cu-400 | 4A-Cu-500 | 4A zeolite       |
|---------------------------------------------------------------------|--------|-----------|-----------|-----------|-----------|------------------|
| Specific surface area(m <sup>2</sup> g <sup>-1</sup> ) <sup>a</sup> | 18.621 | 19.287    | 18.020    | 9.591     | 7.192     | 573 <sup>b</sup> |
| Mean pore size (nm) <sup>a</sup>                                    | 7.032  | 10.681    | 29.396    | 17.296    | 2.769     | 0.4 <sup>b</sup> |

**Note:** <sup>a</sup>Calculated using the NLDFT method. <sup>b</sup>Obtained based on the literature<sup>1</sup>.

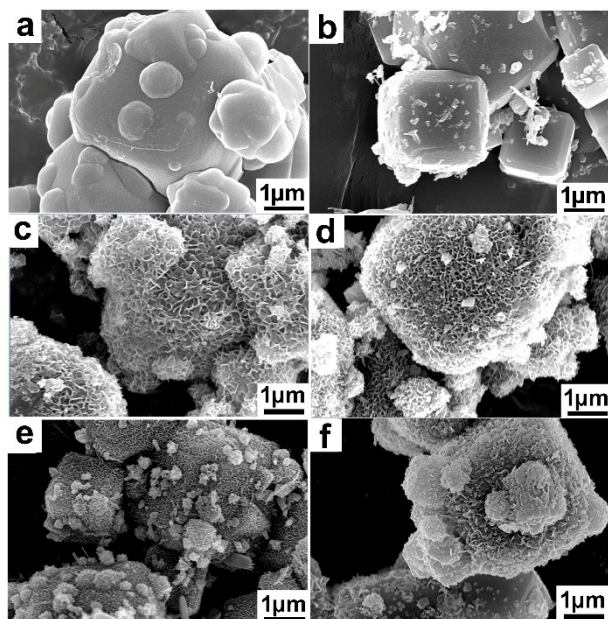

**Figure S5.** The pH effects on the surface morphology of 4A zeolite@CuO<sub>x</sub>Cu(OH)<sub>(2-2x)</sub> (0 ≤ x < 1) nanosheet assemblies core-shell hierarchical architectures: a) pH=1.20; b) pH=1.40; c) pH=1.60; d) pH=1.80; e) pH=2.00; f) pH=4.18.

## S2 Adsorption experiments of Congo red dye

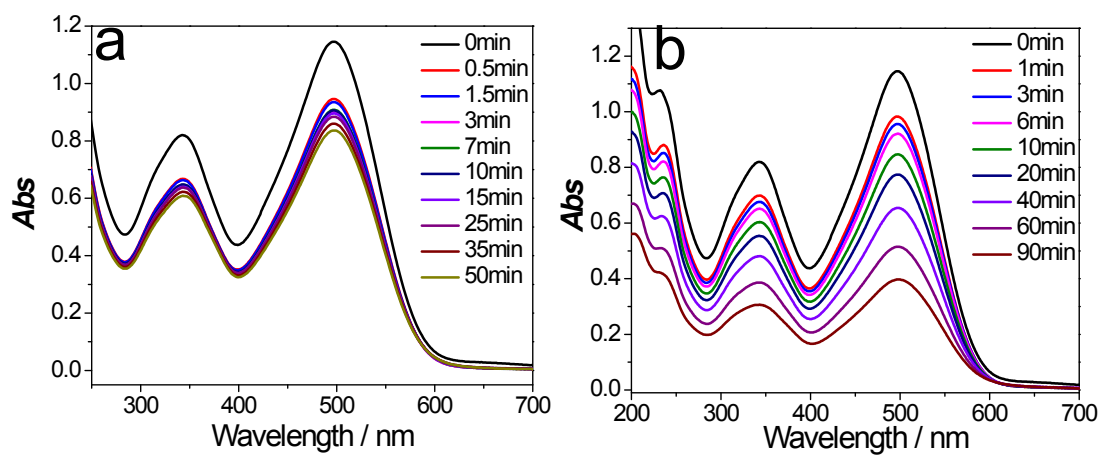



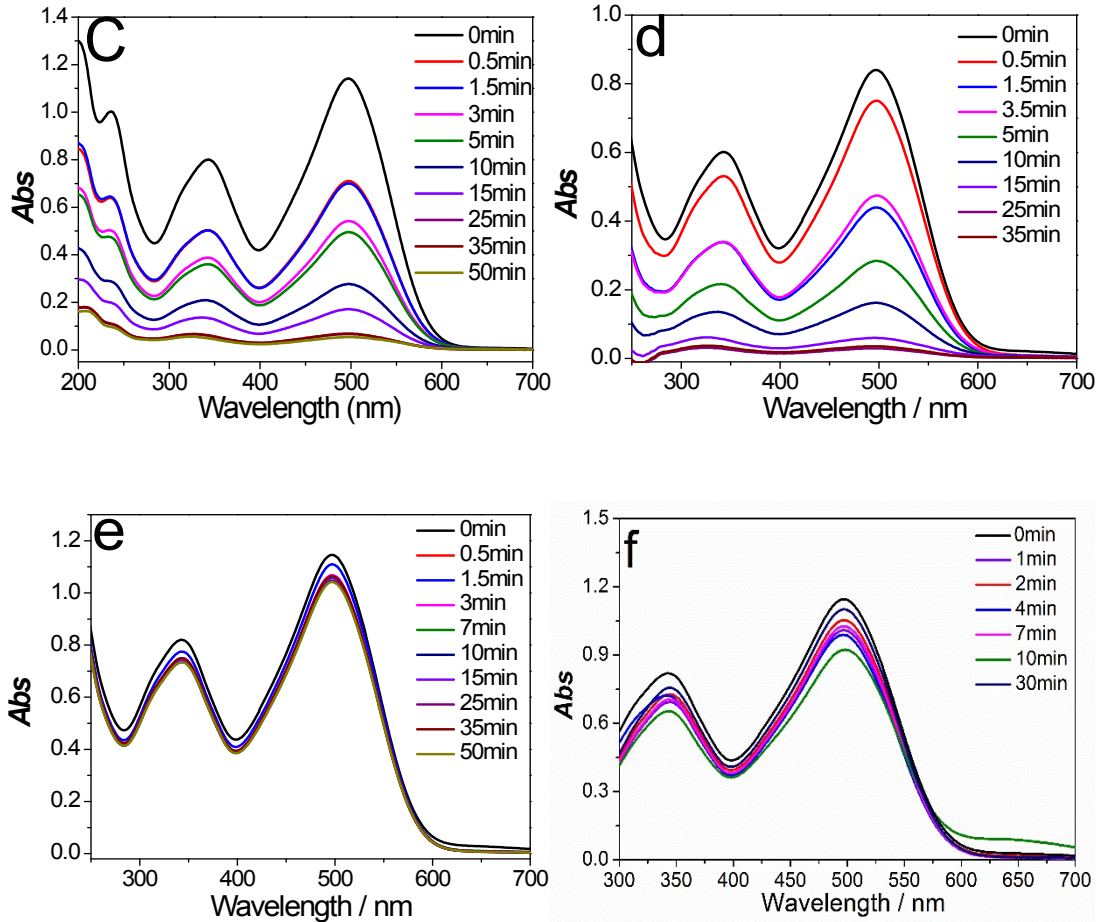

**Figure S6.** The time dependence of the concentration of Congo Red dye with different as-prepared adsorbents: a) 4A-Cu, b) 4A-Cu-200, c) 4A-Cu-300, d) 4A-Cu-400, e) 4A-Cu-500 and f) 4A-Cu-900. Other conditions: Congo Red=100 ml, 1000 mg/L (CR concentration in 4A-Cu-900 adsorption study is 100 mg/L); adsorbent=0.2 g; pH=6.30; T=25<sup>o</sup>C.

### S3 The fitting model for Congo red adsorption experiments

The pseudo-first-order kinetic model (Eq.1) and pseudo-second-order kinetic model (Eq.2) are represented as followed to describe the Congo Red removal on 4A zeolite @ CuO<sub>x</sub>(OH)<sub>(2-2x)</sub>(0≤x<1) hierarchical architectures.

$$\ln(q_e - q_t) = \ln q_e - \frac{k_1 t}{2.303} \dots \dots \dots \text{Eq.1}$$

$$\frac{t}{q_t} = \frac{1}{k_2 q_e^2} + \frac{t}{q_e} \dots \dots \dots \text{Eq.2}$$

where q<sub>e</sub> and q<sub>t</sub> are adsorption capacity at equilibrium and at any time t (min), respectively. k<sub>1</sub> (min<sup>-1</sup>) and k<sub>2</sub> (g·mg<sup>-1</sup>·min<sup>-1</sup>) are the pseudo-first-order and pseudo-second-order rate constants.

The Langmuir (Eq.3) and Freundlich (Eq.4) models were applied to study the adsorption mechanism of Congo Red on the surface of 4A-Cu-300.

$$q_e = \frac{q_m b C_e}{1 + b C_e} \dots \dots \dots Eq.3$$

$$q_e = k_f C_e^{1/n} \dots \dots \dots Eq.4$$

In Eq.3,  $q_m$  (mg/g) is the maximum adsorption capacity corresponding to complete monolayer coverage, and the  $b$  is the equilibrium constant (L/mg). While  $K_f$  is an indicator of the adsorption capacity, and  $n$  is the adsorption intensity.

**Table S2** The kinetic-fitting results of Congo Red adsorption experiments.

| Sample     | Pseudo-first-order-kinetic model |                            |              | Pseudo-Second-order-kinetic model |                                                |              |
|------------|----------------------------------|----------------------------|--------------|-----------------------------------|------------------------------------------------|--------------|
|            | R <sup>2</sup>                   | $k_1$ (min <sup>-1</sup> ) | $q_e$ (mg/g) | R <sup>2</sup>                    | $k_2$ (g·mg <sup>-1</sup> ·min <sup>-1</sup> ) | $q_e$ (mg/g) |
| 4A zeolite | 0.852                            | 1.1967                     | 4.663        | 0.880                             | 0.0011                                         | 4.896        |
| 4A-Cu      | 0.943                            | 1.1001                     | 172.140      | 0.974                             | 0.6236                                         | 182.537      |
| 4A-Cu-200  | 0.960                            | 0.0525                     | 309.532      | 0.977                             | 18.1240                                        | 379.445      |
| 4A-Cu-300  | 0.971                            | 0.2911                     | 463.572      | 0.994                             | 2.3615                                         | 508.379      |
| 4A-Cu-400  | 0.967                            | 0.7657                     | 459.210      | 0.994                             | 0.9765                                         | 495.488      |
| 4A-Cu-500  | 0.942                            | 1.0807                     | 39.360       | 0.954                             | 0.0183                                         | 41.805       |
| 4A-Cu-900  | 0.934                            | 0.1885                     | 9.095        | 0.974                             | 0.0107                                         | 10.604       |

**Note:** The kinetic-fitting study of 4A zeolite and 4A-Cu-900 was executed with the concentration of Congo Red being 100mg/L. Other fitting calculations was carried out when the concentration of Congo Red was 100mg/L.

**Table S3.** The fitting results of isothermal adsorption experiments with 4A-Cu-300 adsorbents.

| Sample    | Langmuir model |              |              | Freundlich model |                                       |       |
|-----------|----------------|--------------|--------------|------------------|---------------------------------------|-------|
|           | R <sup>2</sup> | $K_L$ (L/mg) | $q_e$ (mg/g) | R <sup>2</sup>   | $K_f$ ((mg/g)·(L/mg) <sup>1/n</sup> ) | $n$   |
| 4A-Cu-300 | 0.959          | 8.48749      | 512.987      | 0.879            | 137.61718                             | 4.632 |

#### S4 The calculation method of adsorption capacity

The weight ratio of copper elements is 9.09%, and the maximum adsorption capacity of 4A-Cu-300 is 512.987mg/g. Three standards are taken into consideration to calculate the maximum adsorption capacity.

1 If we use the copper as the standard criteria to calculate the adsorption capacity, the maximum

capacity is  $\frac{512.987mg/g}{9.09\%} = 5643.421mg/g$ ;

2 If the CuO is used as the criteria, the maximum capacity is

$\frac{512.987mg/g}{9.09\%} \times \frac{64}{80} = 4514.737mg/g$ ;

3 If the Cu(OH)<sub>2</sub> is applied to calculate the capacity, the maximum adsorption capacity is

$$\frac{512.987\text{mg}}{\text{g}} \div 9.09\% \times \frac{64}{98} = 3685.500\text{mg/g}.$$

In fact, given that the CuO and Cu(OH)<sub>2</sub> phase coexist in the shell structure of 4A-Cu-300, the lowest limit of the maximum adsorption capacity is 3685.500mg/g.

## REFERENCES

- (1) Zhang, L.; Ye, H.; Zhao, L.; Zhang, L.; Yao, L.; Zhang, Y.; Li, H. Design of isolated iron species for Fenton reactions: lyophilization beats calcination treatment. *Chem. Commun.* **2015**, *51*, 16936-16939.
